# Supplementary material
Source: PubMed Central journal article supplement (PMC3549625)
Supplement: Supp_Fig1.pdf [file Supp_Fig1.pdf]

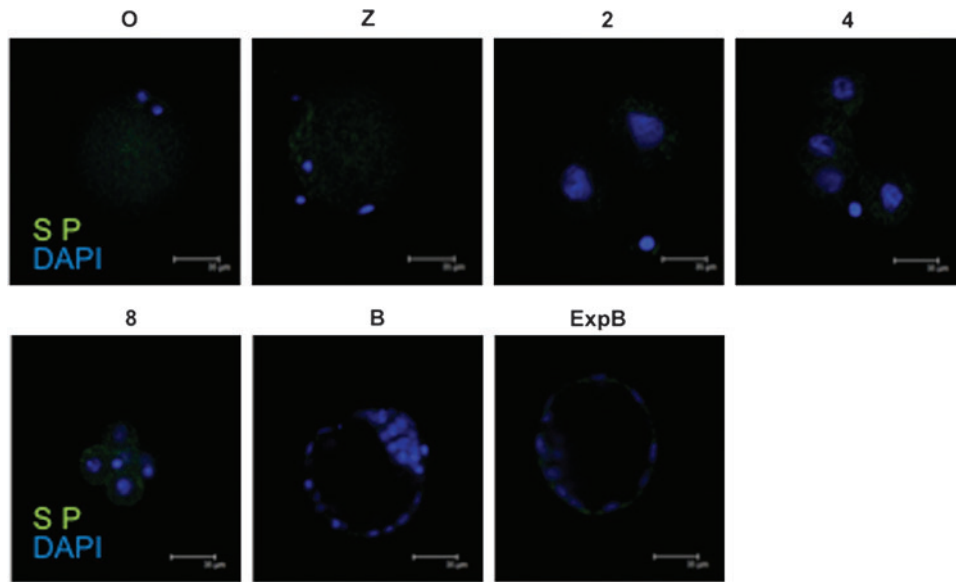

**SUPPLEMENTARY FIG. S1.** Control embryos corresponding to Fig. 2A [immunofluorescent detection of REX1 stained with A488 (green) in confocal sections]. Negative control embryos from the same experiment incubated without primary antibody (SP) and processed in parallel are labeled as follows: O, oocyte at metaphase II; Z, zygote; 2, 4, 8: 2-, 4-, 8-cell embryos; M, morula, B, blastocyst. Chromatin staining with DAPI is shown in blue. Scale bar=35  $\mu$ m.
