# Supplementary material
Source: PubMed Central journal article supplement (PMC3549625)
Supplement: Supp_Fig2.pdf [file Supp_Fig2.pdf]

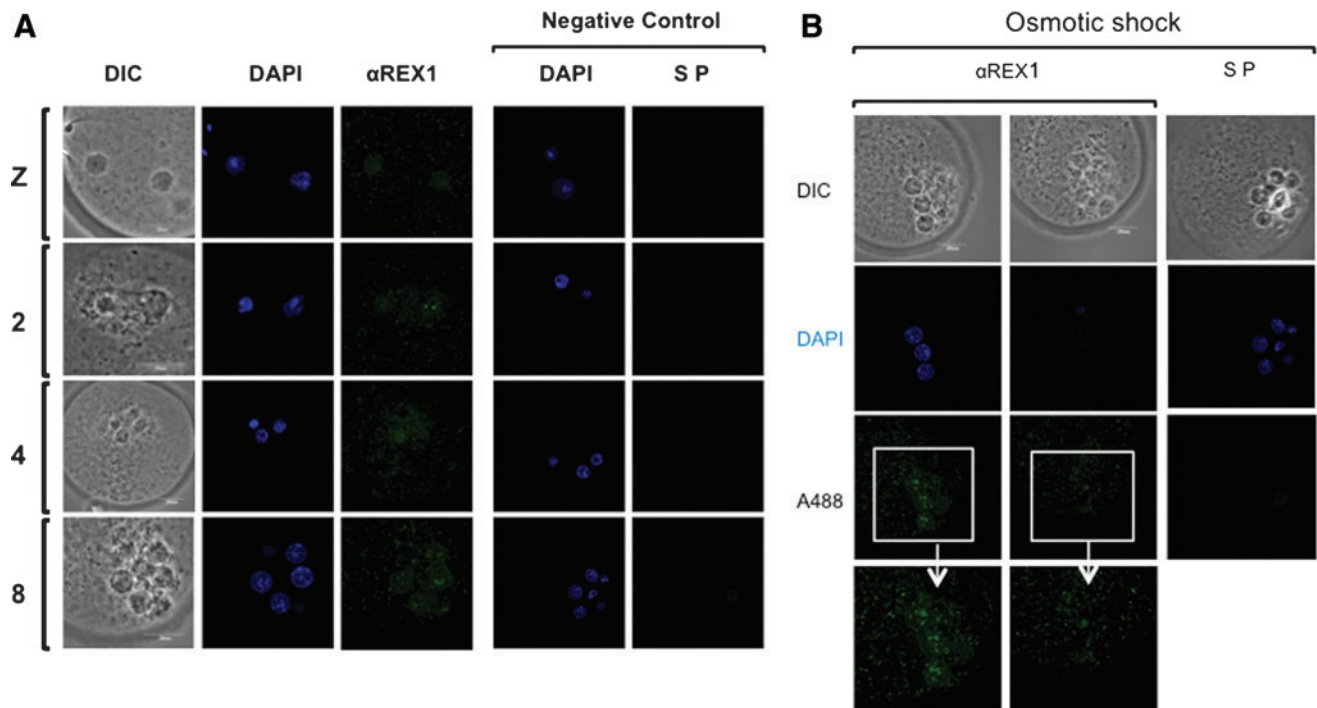

**SUPPLEMENTARY FIG. S2.** (A) REX1 is chromatin associated. Confocal sections as in Fig. 2A show anti-REX1 immunoreactivity (A488, green) in mouse preimplantation embryos pretreated with Tx100 before fixation to extract nonchromatin-bound protein. Negative control embryos processed in parallel without a primary antibody are marked SP. (B) Optical sections show anti-REX1 immunoreactivity in 8-cell mouse embryos pretreated with Tx100 before fixation to extract nonchromatin-bound protein. DAPI staining indicates chromatin (blue), while REX1 (A488, green) appears only overlapping with chromatin. SP indicates a control staining without primary antibody. The boxed area in REX1-stained panels is shown amplified below. Scale bar=20 μm.
