# Supplementary material
Source: PubMed Central journal article supplement (PMC3549625)
Supplement: Supp_Fig3.pdf [file Supp_Fig3.pdf]

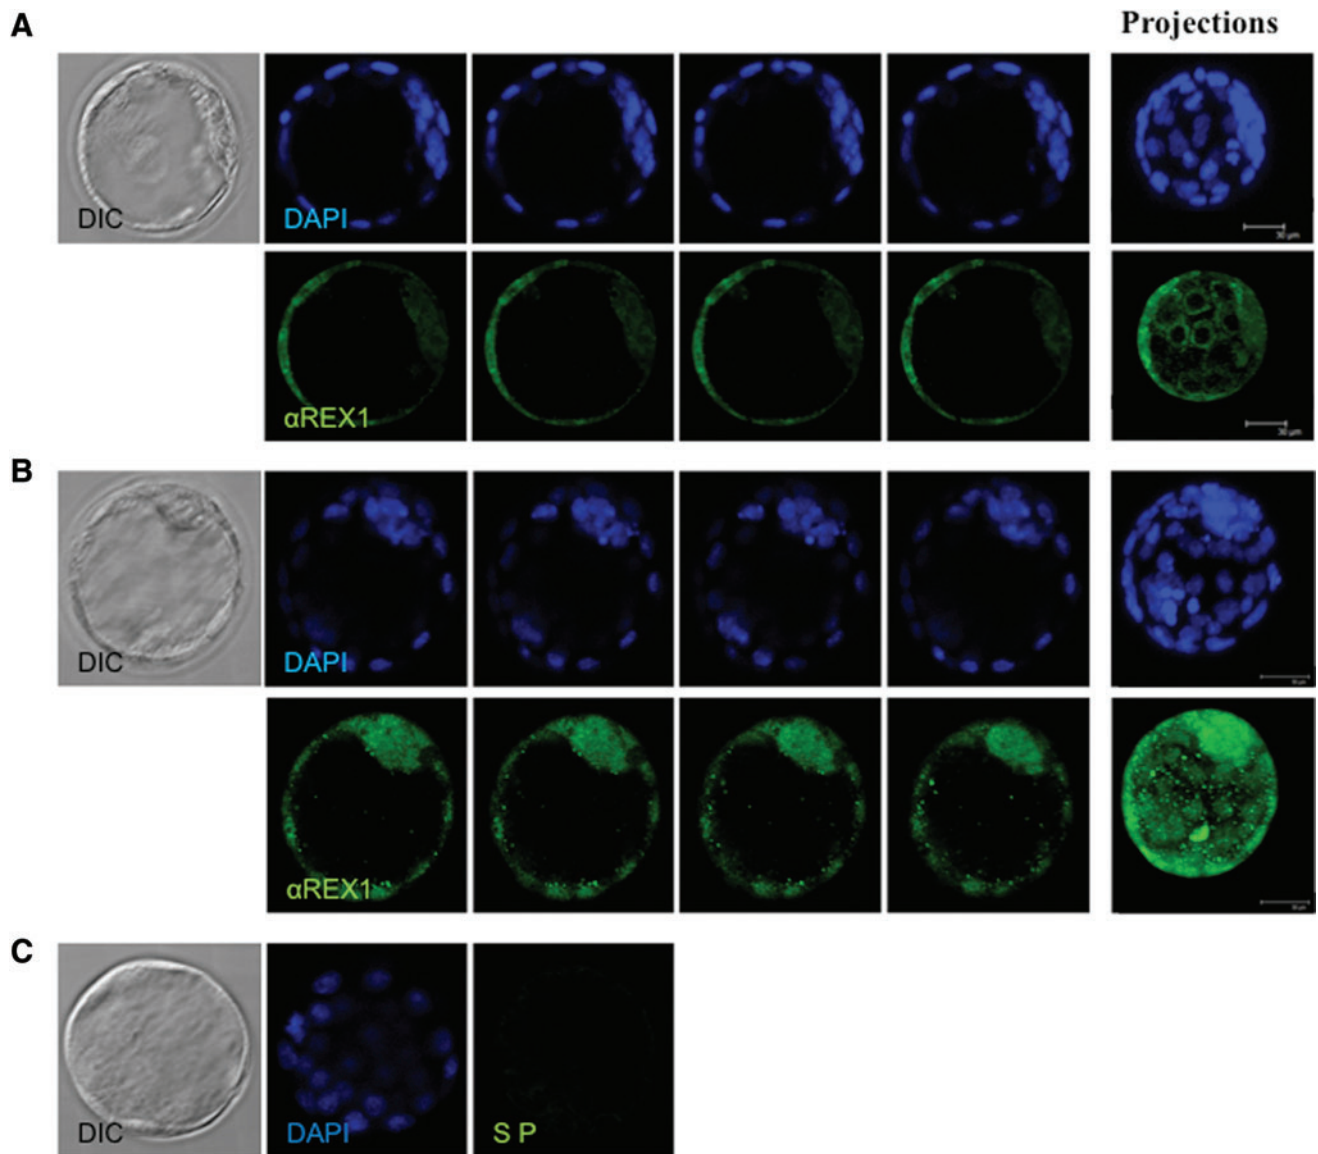

**SUPPLEMENTARY FIG. S3.** Detection of anti-REX1 immunoreactivity in late blastocysts (E4.5) in virtual confocal sections as in Fig. 2, except when indicated otherwise. Scale bar = 30  $\mu$ m. DAPI staining and the corresponding  $\alpha$ REX1 immunoreactivity are shown in serial sections. **(A)** Example of perinuclear pattern. **(B)** Example of predominantly nuclear pattern. **(C)** Control embryo without primary antibody (SP).
