# Supplementary material
Source: PubMed Central journal article supplement (PMC3549625)
Supplement: Supp_Fig4.pdf [file Supp_Fig4.pdf]

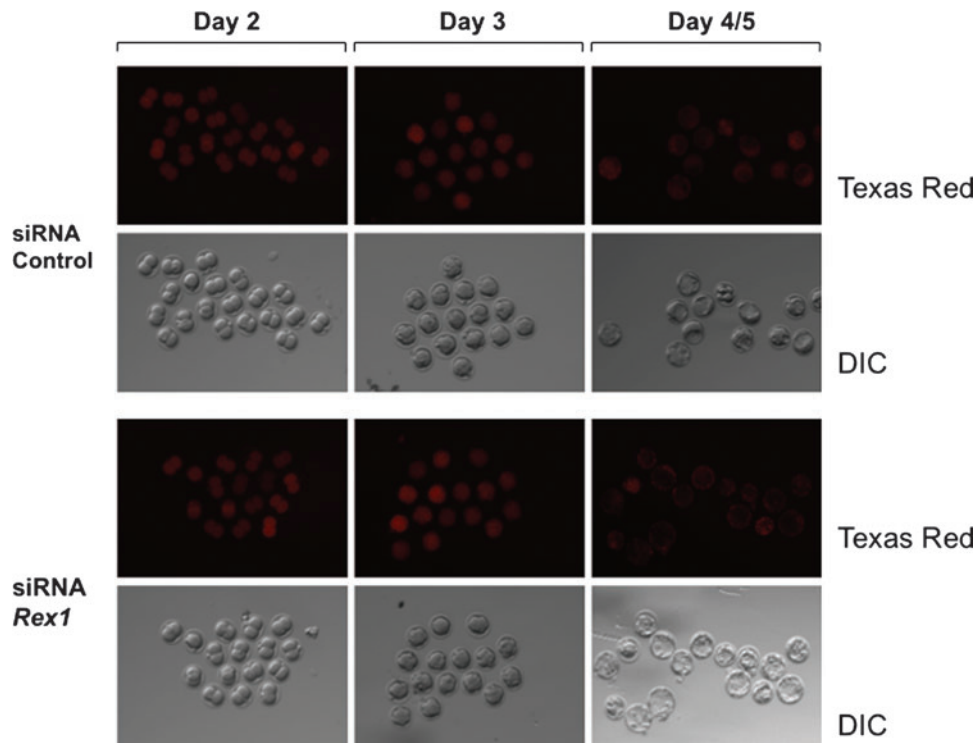

**SUPPLEMENTARY FIG. S4.** Development of mouse embryos with attenuated *Rex1* levels. Representative images showing the in vitro development of embryos injected on day 1 with Stealth-2 siRNA directed against *Rex1* (siRex) or Control siRNA (siCon), together with Dextran Texas Red (shown in red). The siRex-injected embryos developed as control embryos. Percentages of development into respective stages are represented in Supplementary Table S1.
