# Supplementary material
Source: PubMed Central journal article supplement (PMC3549625)
Supplement: Supp_Table1.pdf [file Supp_Table1.pdf]

## Supplementary Data

SUPPLEMENTARY TABLE S1. DEVELOPMENT OF MOUSE EMBRYOS WITH ATTENUATED *REX1* LEVELS

| siRNA control | 2 cell  |       | morula |       | blastocyst |       |
|---------------|---------|-------|--------|-------|------------|-------|
|               | Day 2   |       | Day 3  |       | Day 4      |       |
| E 1           | 22/26   | 84,6% | -      | -     | 15/26      | 68,2% |
| E 2           | 45/45   | 100%  | 29/45  | 64,4% | 23/45      | 51,1% |
| E 3           | 21/22   | 95,5% | 15/22  | 68,2% | -          | -     |
| E 4           | 13/16   | 81,2% | 14/15  | 93,3% | 3/8        | 37,5% |
| E 5           | 21/21   | 100%  | 21/21  | 100%  | -          | -     |
| TOTAL         | 122/130 | 93,8% | 79/103 | 76,7% | 41/79      | 51,9% |

  

| siRNA <i>Rex1</i> | 2 cell  |       | morula |       | blastocyst |       |
|-------------------|---------|-------|--------|-------|------------|-------|
|                   | Day 2   |       | Day 3  |       | Day 4      |       |
| E 1               | 24/26   | 92,3% | -      | -     | 11/24      | 45,8% |
| E 2               | 43/43   | 100%  | 26/43  | 60,5% | 20/43      | 46,5% |
| E 3               | 14/14   | 100%  | 10/14  | 71,4% | -          | -     |
| E 4               | 18/21   | 85,7% | 21/21  | 100%  | 13/14      | 92,9% |
| E 5               | 18/18   | 100%  | 18/18  | 100%  | -          | -     |
| TOTAL             | 117/122 | 95,9% | 75/96  | 78,1% | 44/81      | 54,3% |

Development of embryos injected with siRNAs as in Supplementary Fig. S4; the table shows the sum of 5 independent experiments (E1–E5). The table shows the number of embryos and the percentage that reached the 2 cell-stage on day 2, morula on day 3, and early blastocyst on day 4. No statistically significant differences were found between the 2 groups at the stages analyzed (day 2:  $P=0.6511$ ; day 3:  $P=0.810$ ; day 4:  $P=0.8819$ ).
