# Supplementary material
Source: PubMed Central journal article supplement (PMC3549625)
Supplement: Supp_Table2.pdf [file Supp_Table2.pdf]

SUPPLEMENTARY TABLE S2. BLASTOCYST DEVELOPMENT  
IN INDIVIDUAL EXPERIMENTS

| <b>GFP↓</b>  | <b>N° 4 cell embryos</b> | <b>N° blastocysts</b> | <b>% total</b> |
|--------------|--------------------------|-----------------------|----------------|
| E 1          | 9                        | 5                     | 55.5 %         |
| E 2          | 11                       | 11                    | 100 %          |
| E 3          | 25                       | 16                    | 64%            |
| E 4          | 15                       | 6                     | 40%            |
| E 5          | 9                        | 8                     | 88.9 %         |
| <b>Total</b> | <b>69</b>                | <b>46</b>             | <b>66.7 %</b>  |

| <b>GFP↑</b>  | <b>N° 4 cell embryos</b> | <b>N° blastocysts</b> | <b>% total</b> |
|--------------|--------------------------|-----------------------|----------------|
| E 1          | 9                        | 2                     | 22,2 %         |
| E 2          | 9                        | 6                     | 66.7%          |
| E 3          | 16                       | 7                     | 43,8%          |
| E 4          | 26                       | 6                     | 23,1%          |
| E 5          | 13                       | 4                     | 30,8 %         |
| <b>Total</b> | <b>73</b>                | <b>25</b>             | <b>34.2 %</b>  |

Embryos were separated in (GFP↑) or (GFP↓) groups as explained in the legend to Fig. 6B, and blastocyst development was scored in 5 independent experiments E1-E5. The table shows the number and fraction of 4-cell embryos that develop into blastocyst in each individual experiment.
